# Supplementary material for: Three-dimensional ordered macroporous cerium–manganese composite oxide for NO oxidation
Source: Royal Society of Chemistry journal article supplement (doi:10.1039/d3cy01059g), 2023-01-01
Supplement: d3cy01059g1.pdf [file d3cy01059g1.pdf]

Electronic Supplementary Material

Three-dimensional ordered macroporous cerium-manganese  
composite oxide for NO oxidation

Canyang Qu,<sup>a</sup> Ping Wang,<sup>a</sup> Miao He,<sup>a</sup> Cheng Yang,<sup>a</sup> Jing Xiong,<sup>b</sup> Xiaohua Sun,<sup>\*a</sup> Yuechang Wei<sup>\*b</sup>  
and Zhenxing Li<sup>\*a</sup>

<sup>a</sup>State Key Laboratory of Heavy Oil Processing, College of New Energy and Materials, China  
University of Petroleum (Beijing), Beijing 102249, China. E-mail: hua82@126.com;  
lizx@cup.edu.cn

<sup>b</sup>College of Science, China University of Petroleum (Beijing), Beijing 102249, China. E-mail:  
weiyu@cup.edu.cn

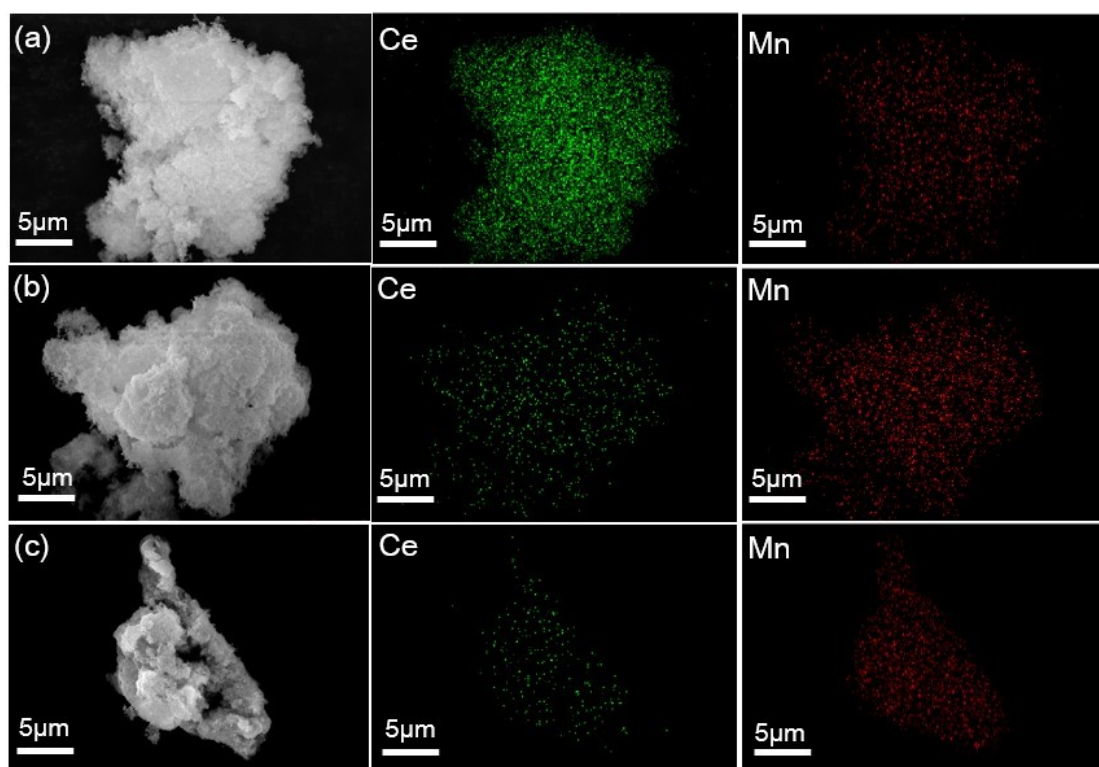

**Fig. S1** EDS for cerium-manganese macroporous catalysts of different proportions: (a) CM1, (b) CM3, (c) CM4.

**Table S1** Specific surface area, pore volume and mesoporous aperture of catalyst

| <b>Catalysts</b>               | <b>Surface area(m<sup>2</sup>/g)</b> | <b>Total pore volume(cm<sup>3</sup>/g)</b> |
|--------------------------------|--------------------------------------|--------------------------------------------|
| CeO <sub>2</sub>               | 68                                   | 0.19                                       |
| Mn <sub>2</sub> O <sub>3</sub> | 27                                   | 0.20                                       |
| CM1                            | 58                                   | 0.13                                       |
| CM2                            | 60                                   | 0.25                                       |
| CM3                            | 53                                   | 0.21                                       |
| CM4                            | 49                                   | 0.28                                       |

**Table S2** Compositions of catalyst surfaces.

| <b>Catalysts</b>               | <b>Ce<sup>3+</sup>(%)</b> | <b>Mn<sup>3+</sup>(%)</b> | <b>SurfaceO(O<sup>-</sup>)(%)</b> |
|--------------------------------|---------------------------|---------------------------|-----------------------------------|
| CeO <sub>2</sub>               | 13.7                      | —                         | —                                 |
| Mn <sub>2</sub> O <sub>3</sub> | —                         | 48.2                      | —                                 |
| CM1                            | 13.6                      | 63.1                      | 25.8                              |
| CM2                            | 19.7                      | 65.8                      | 34.2                              |
| CM3                            | 23.5                      | 61.5                      | 27.6                              |
| CM4                            | 22.1                      | 52.5                      | 28.3                              |

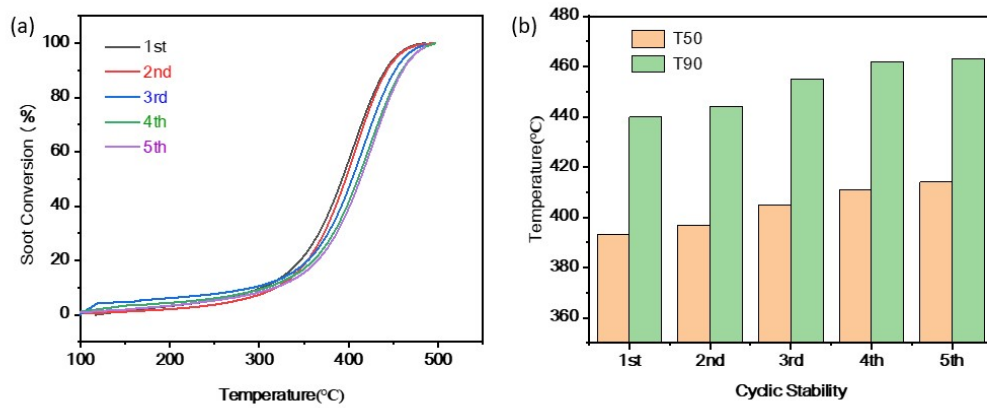

**Fig. S2** CM2 soot combustion cycle test: (a) CM2 soot combustion cycle test curve, (b) conversion rate of T50 and T90.
